# Supplementary material for: Ameliorative Effects of Silicon against Salt Stress in Gossypium hirsutum L
Source: MDPI journal article supplement (doi:10.3390/antiox11081520), 2022-08-04
Supplement: s1 [file s1]

Table S1 Primer sequences used for qRT-PCR.

| gene ID     | Genen Name | Forward primer (5' -3' ) | Reverse primer (5' -3' ) |
|-------------|------------|--------------------------|--------------------------|
| Gh_A13G2023 | CNP 60A-1  | CGAGGGTGCTAGTAACTGAT     | TCCAGTAACATCCTCCGCAA     |
| Gh_D13G2425 | CNP 60A-2  | CGAAAGTAGTCAATGATGGG     | CCATCACCTGCAGAGTCATT     |
| Gh_A05G1083 | CNP 60B-1  | TGGCTATAATGCTGCAACTGG    | GATGTCGACAACCACGGCAT     |
| Gh_D05G1261 | CNP 60B-2  | CTAGTAGATGTGGCTGCTGT     | TTGTTTTCCGAAGTGTACCT     |
| Gh_A01G0845 | CAT1       | TGCATTTTGCCCTGCCATTGTG   | TGTGCCTCTGGGTATCAGCGTA   |
| Gh_D06G1170 | POD        | TCAAGAGGCTGTCAATCTGGCG   | TGGCCAGTGTTCGATTGCTGT    |
| Gh_D13G1062 | SODCC      | ACTCAAGAGGGAGATGGCCAA    | AATGGAGTGTGGCCAGAGAGA    |
| Actin       | —          | ATCCTCCGTCTTGACCTTG      | TGTCCGTCAGGCAACTCAT      |

Table S2 Effect of exogenous silicon on stomatal characteristics of Z9807 and Z0102 under saline and non-saline conditions

| Genotype | Treatment | Length<br>( $\mu\text{m}$ ) | Width<br>( $\mu\text{m}$ ) | Surface<br>( $\mu\text{m}^2$ ) | ESD<br>(No. $\text{mm}^{-2}$ ) |
|----------|-----------|-----------------------------|----------------------------|--------------------------------|--------------------------------|
| Z9807    | CK        | 14.33 <sup>c</sup>          | 6.41 <sup>a</sup>          | 14.65 <sup>b</sup>             | 397.7 <sup>a</sup>             |
|          | CKSi      | 15.04 <sup>b</sup>          | 6.41 <sup>a</sup>          | 15.70 <sup>b</sup>             | 386.4 <sup>a</sup>             |
|          | NaCl      | 13.07 <sup>d</sup>          | 6.51 <sup>a</sup>          | 4.06 <sup>e</sup>              | 181.8 <sup>d</sup>             |
|          | NaClSi    | 14.94 <sup>b</sup>          | 6.35 <sup>a</sup>          | 12.14 <sup>c</sup>             | 340.9 <sup>b</sup>             |
| Z0102    | CK        | 14.25 <sup>c</sup>          | 6.31 <sup>a</sup>          | 15.02 <sup>b</sup>             | 431.8 <sup>a</sup>             |
|          | CKSi      | 15.99 <sup>a</sup>          | 6.38 <sup>a</sup>          | 17.18 <sup>a</sup>             | 375.0 <sup>a</sup>             |
|          | NaCl      | 13.11 <sup>d</sup>          | 6.51 <sup>a</sup>          | 2.99 <sup>e</sup>              | 159.1 <sup>d</sup>             |
|          | NaClSi    | 15.22 <sup>b</sup>          | 6.31 <sup>a</sup>          | 7.01 <sup>d</sup>              | 250.0 <sup>c</sup>             |

ESD, Effective stomata density (number of opening stomata  $\text{mm}^{-2}$ ). Data represents means of three replicates. Different letters within same testing trait indicates significant differences between treatments ( $p \leq 0.05$ ).
