# Supplementary material for: Ameliorative Effects of Silicon against Salt Stress in Gossypium hirsutum L
Source: MDPI journal article supplement (doi:10.3390/antiox11081520), 2022-08-04
Supplement: s1 [file s1]

1. Si can mitigate the negative effect of salinity on cotton growth.
2. Si decreased the ROS level of salt stressed cotton plants.
3. Si enhanced the antioxidant enzyme activity of salt-stressed cotton.
4. Si alleviated the decrease of electron transfer rate caused by salt stress.
